# Supplementary material
Source: Springer Nature journal article supplement (https://www.springermedizin.de/resource/supplementary/12936_2013_3182_MOESM4_ESM.pdf/9545222)

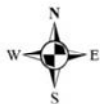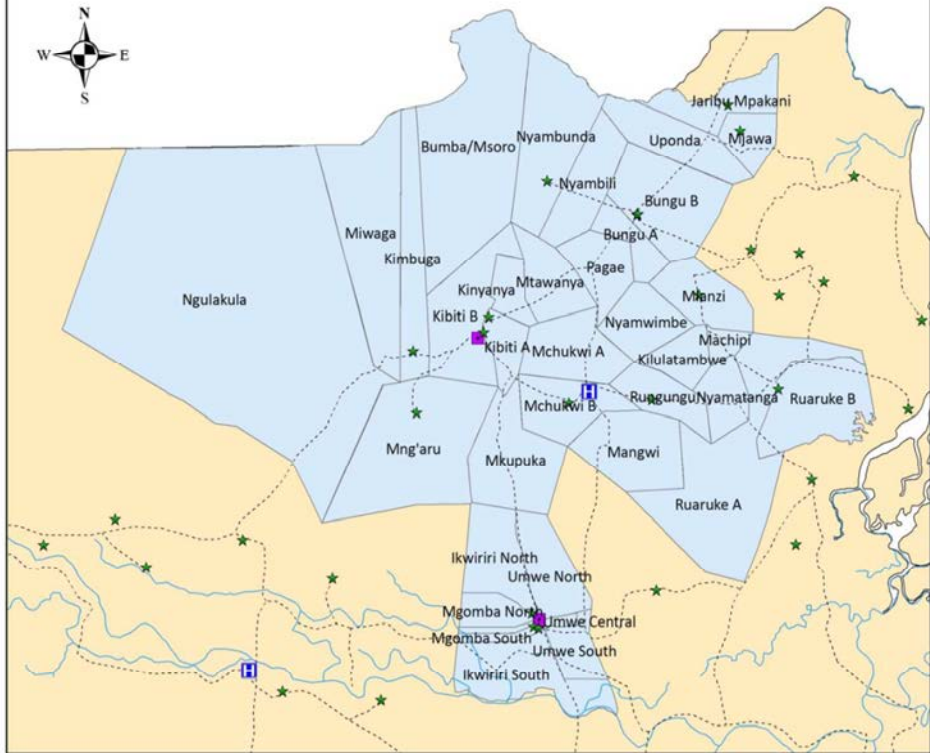

- |   |               |       |            |   |                   |
|---|---------------|-------|------------|---|-------------------|
| ★ | Dispensary    | ----- | Major Road | ■ | DSS Village       |
| H | Hospital      | —     | River      | ■ | District Boundary |
| ■ | Health Centre |       |            |   |                   |

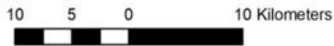

Supplement: MOESM4 [file 9545222]
